# Supplementary material for: Behavioral factors and SARS-CoV-2 transmission heterogeneity within a household cohort in Costa Rica
Source: PubMed Central journal article supplement (PMC10363136; doi:10.1038/s43856-023-00325-6), 2023-07-22
Supplement: 43856_2023_325_MOESM1_ESM.pdf [file 43856_2023_325_MOESM1_ESM.pdf]

1 **Supplementary information:**

2 **Behavioral factors and SARS-CoV-2 transmission heterogeneity within a**  
3 **household cohort in Costa Rica**

4 Kaiyuan Sun<sup>1</sup>, Viviana Loria<sup>2</sup>, Amada Aparicio<sup>3</sup>, Carolina Porras<sup>2</sup>, Juan Carlos Vanegas<sup>2</sup>, Michael Zúñiga<sup>2</sup>, Melvin  
5 Morera<sup>3</sup>, Carlos Avila<sup>2</sup>, Arturo Abdelnour<sup>3</sup>, Mitchell H. Gail<sup>4</sup>, Ruth Pfeiffer<sup>4</sup>, Jeffrey I. Cohen<sup>5</sup>, Peter D. Burbelo<sup>6</sup>,  
6 Mehdi A Abed<sup>6</sup>, Cécile Viboud<sup>1</sup>, Allan Hildesheim<sup>4</sup>, Rolando Herrero<sup>2</sup>, D Rebecca Prevots<sup>7</sup>, for the RESPIRA Study  
7 Group<sup>8</sup>

8 <sup>1</sup>Division of International Epidemiology and Population Studies, Fogarty International Center, National Institutes of  
9 Health (NIH), Bethesda, MD

10 <sup>2</sup>Agencia Costarricense de Investigaciones Biomédicas (ACIB) – Fundación INCIENSA (FUNIN) , San Jose, Costa  
11 Rica

12 <sup>3</sup>Caja Costarricense de Seguro Social, San Jose, Costa Rica

13 <sup>4</sup>Division of Cancer Epidemiology and Genetics, National Cancer Institute, NIH, Bethesda, MD

14 <sup>5</sup>Laboratory of Infectious Diseases, National Institute of Allergy and Infectious Diseases (NIAID), NIH, Bethesda,  
15 MD

16 <sup>6</sup>National Institute of Dental and Craniofacial Research, NIH, Bethesda, MD

17 <sup>7</sup>Epidemiology and Population Studies Unit, Laboratory of Clinical Immunology and Microbiology, Division of  
18 Intramural Research, NIAID, NIH, Bethesda, MD

19 <sup>8</sup>RESPIRA Study Group: Caja Costarricense de Seguro Social: Amada Aparicio, Karla Moreno, Roy Wong, Melvin  
20 Morera, Arturo Abdelnour, Alejandro Calderon, Kattia Camacho, Gabriela Ivankovich, Adriana Yock ; Ministerio  
21 de Salud, Costa Rica: Roberto Castro. Agencia Costarricense de Investigaciones Biomédicas (ACIB) – Fundación  
22 INCIENSA (FUNIN): . Rolando Herrero, Carolina Porras, Bernal Cortés, Viviana Loría, Rebecca Ocampo, Michael  
23 : Zúñiga; Universidad de Costa Rica (UCR) ; Cristina Barboza-Solis, Romain Fantin : Universidad de Costa Rica  
24

25 **Correspondence to:**

26 D Rebecca Prevots, Epidemiology and Population Studies Unit, Laboratory of Clinical Immunology and  
27 Microbiology, Division of Intramural Research, NIAID, NIH, Bethesda, MD

28 [rprevots@niaid.nih.gov](mailto:rprevots@niaid.nih.gov)

29 or

30 Kaiyuan Sun, Division of International Epidemiology and Population Studies, Fogarty International Center, National  
31 Institutes of Health (NIH), Bethesda, MD

32 [kaiyuan.sun@nih.gov](mailto:kaiyuan.sun@nih.gov)

1 **Table S1:** Model selection on the risk factors for household chain-binomial transmission model.

| <b>Model</b>                              |                                                     | <b>0</b> | <b>1</b> | <b>2</b> | <b>3</b> | <b>4</b> | <b>5</b> | <b>6</b> | <b>7</b> | <b>8</b> | <b>9</b> | <b>10</b> | <b>11</b> | <b>12</b> | <b>13</b> | <b>14</b> | <b>15</b> |
|-------------------------------------------|-----------------------------------------------------|----------|----------|----------|----------|----------|----------|----------|----------|----------|----------|-----------|-----------|-----------|-----------|-----------|-----------|
| <b>Log Likelihood</b>                     |                                                     | 477      | 476      | 475      | 467      | 467      | 465      | 463      | 462      | 437      | 429      | 420       | 418       | 416       | 415       | 413       | 412       |
| <b>Akaike Information Criterion (AIC)</b> |                                                     | 959      | 955      | 965      | 957      | 957      | 957      | 955      | 954      | 907      | 891      | 876       | 876       | 876       | 877       | 878       | 880       |
| <b>ΔAIC</b>                               |                                                     | 0        | -4       | +6       | -2       | -2       | -2       | -4       | -5       | -52      | -68      | -83       | -83       | -83       | -82       | -81       | -79       |
| <b>Baseline</b>                           | Baseline community risk                             | *        | *        | *        | *        | *        | *        | *        | *        | *        | *        | *         | *         | *         | *         | *         | *         |
|                                           | Index case & seropositive household members         | *        |          |          |          |          |          |          |          |          |          |           |           |           |           |           |           |
|                                           | Index case                                          |          | *        | *        | *        | *        | *        | *        | *        | *        | *        | *         | *         | *         | *         | *         | *         |
|                                           | Seropositive household members                      |          | *        | *        | *        | *        | *        | *        | *        | *        | *        | *         | *         | *         | *         | *         | *         |
| <b>Risk factors</b>                       | Cumulative incidence rate (relative community risk) |          | *        | *        | *        | *        | *        | *        | *        | *        | *        | *         | *         | *         | *         | *         | *         |
|                                           | Age, transmissibility                               |          |          | *        | *        | *        | *        | *        | *        | *        | *        | *         | *         | *         | *         | *         | *         |
|                                           | Age, susceptibility                                 |          |          |          | *        | *        | *        | *        | *        | *        | *        | *         | *         | *         | *         | *         | *         |
|                                           | Sex, transmissibility                               |          |          |          |          | *        | *        | *        | *        | *        | *        | *         | *         | *         | *         | *         | *         |
|                                           | Sex, susceptibility                                 |          |          |          |          |          | *        | *        | *        | *        | *        | *         | *         | *         | *         | *         | *         |
|                                           | Obesity, transmissibility                           |          |          |          |          |          |          | *        | *        | *        | *        | *         | *         | *         | *         | *         | *         |
|                                           | Obesity, susceptibility                             |          |          |          |          |          |          |          | *        | *        | *        | *         | *         | *         | *         | *         | *         |
|                                           | Household size                                      |          |          |          |          |          |          |          |          | *        | *        | *         | *         | *         | *         | *         | *         |
|                                           | Log2 (No. of household contacts)                    |          |          |          |          |          |          |          |          |          | *        | *         | *         | *         | *         | *         | *         |
|                                           | Shared bedroom with index (Y/N)                     |          |          |          |          |          |          |          |          |          |          | *         | *         | *         | *         | *         | *         |
|                                           | Cared for index (Y/N)                               |          |          |          |          |          |          |          |          |          |          |           | *         | *         | *         | *         | *         |
|                                           | If wore mask > half of the time (index case)        |          |          |          |          |          |          |          |          |          |          |           |           | *         | *         | *         | *         |
|                                           | If wore mask > half of the time (household member)  |          |          |          |          |          |          |          |          |          |          |           |           |           | *         | *         | *         |
|                                           | Hours with index outside bedroom                    |          |          |          |          |          |          |          |          |          |          |           |           |           |           | *         | *         |
|                                           | If symptomatic                                      |          |          |          |          |          |          |          |          |          |          |           |           |           |           |           | *         |

2

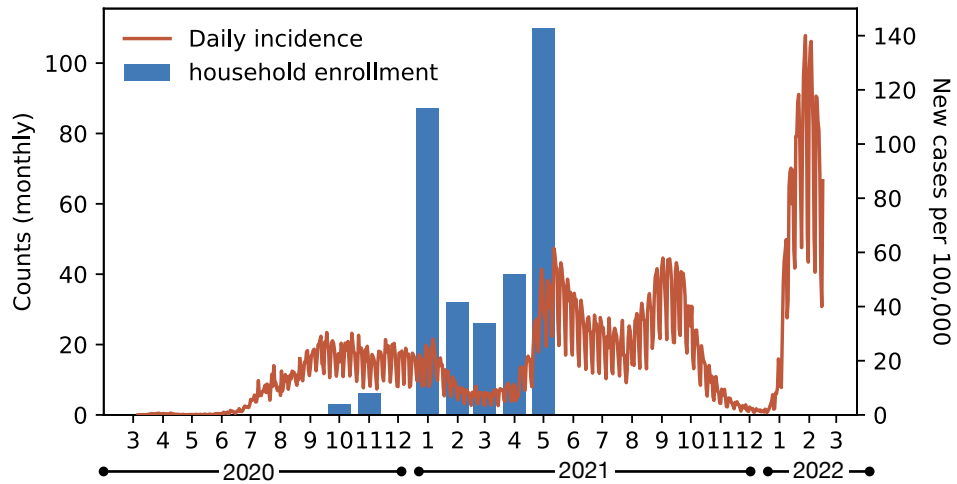

1

2 **Figure S1:** Daily incidence of reported SARS-CoV-2 cases in Costa Rica (red line) and the monthly number of  
 3 enrolled households based on the index cases' diagnosis time (blue bar).

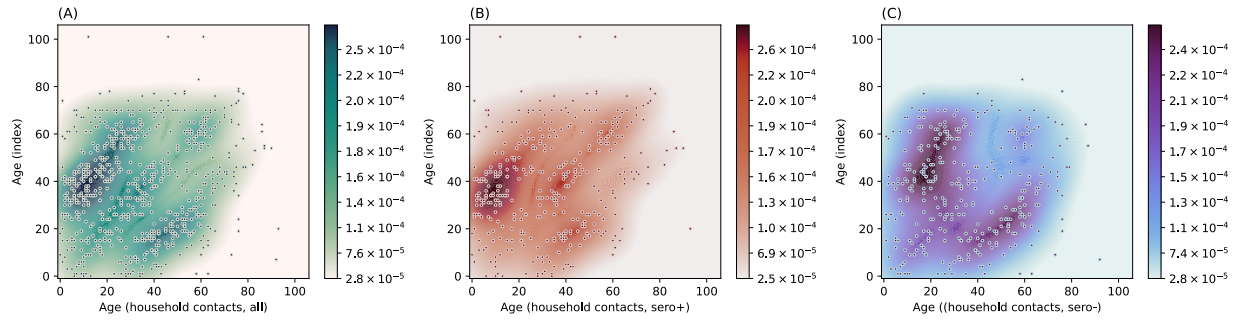

1  
 2 **Figure S2:** (A) Contact patterns between index cases and household members. Each dot represents the age pairs  
 3 between index and household member and heatmap represents the frequency. (B) Same as (A) but only for seropositive  
 4 household members only. (C) Same as (A) but for seronegative household members only. Colorbars indicate  
 5 probability density.

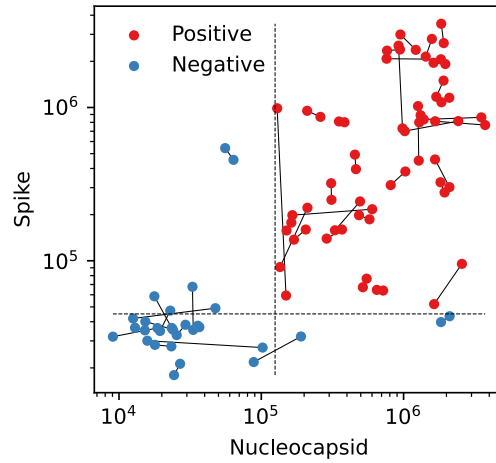

1  
2 **Figure S3:** The results of the serologic readout for the quality control samples (including both pre-pandemic samples  
3 as negative control and a subset of the study sample). Each sample were tested in duplicate (connected by the solid  
4 line). The dashed lines are pre-defined positive cutoff for both the Nucleocapsid and the Spike protein. We require a  
5 seropositive sample (red dots) as being positive on both spike and nucleocapsid proteins and seropositive otherwise  
6 (blue dots). For the quality control samples, all duplicates give consistent results on seropositivity.

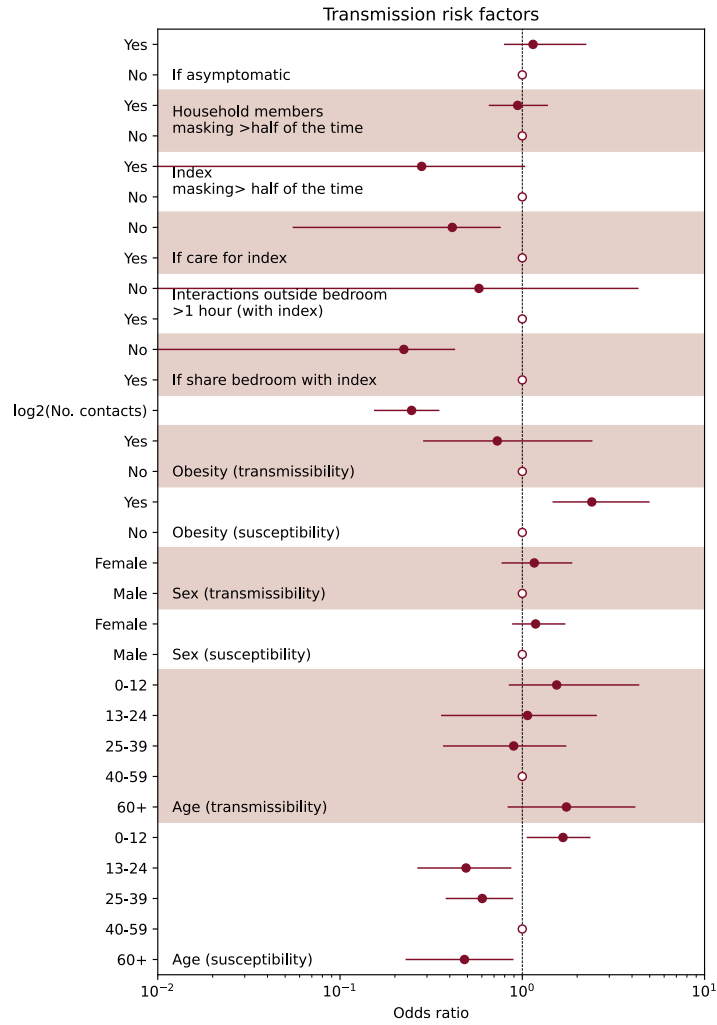

1  
2  
3  
4  
5

**Figure S4:** Estimates from the chain-binomial household transmission model with household level bootstrapping. Solid dots and horizontal lines represent point estimates and 95% confidence intervals of the adjusted odds ratios of transmission risk factors. Circles represent the reference class.

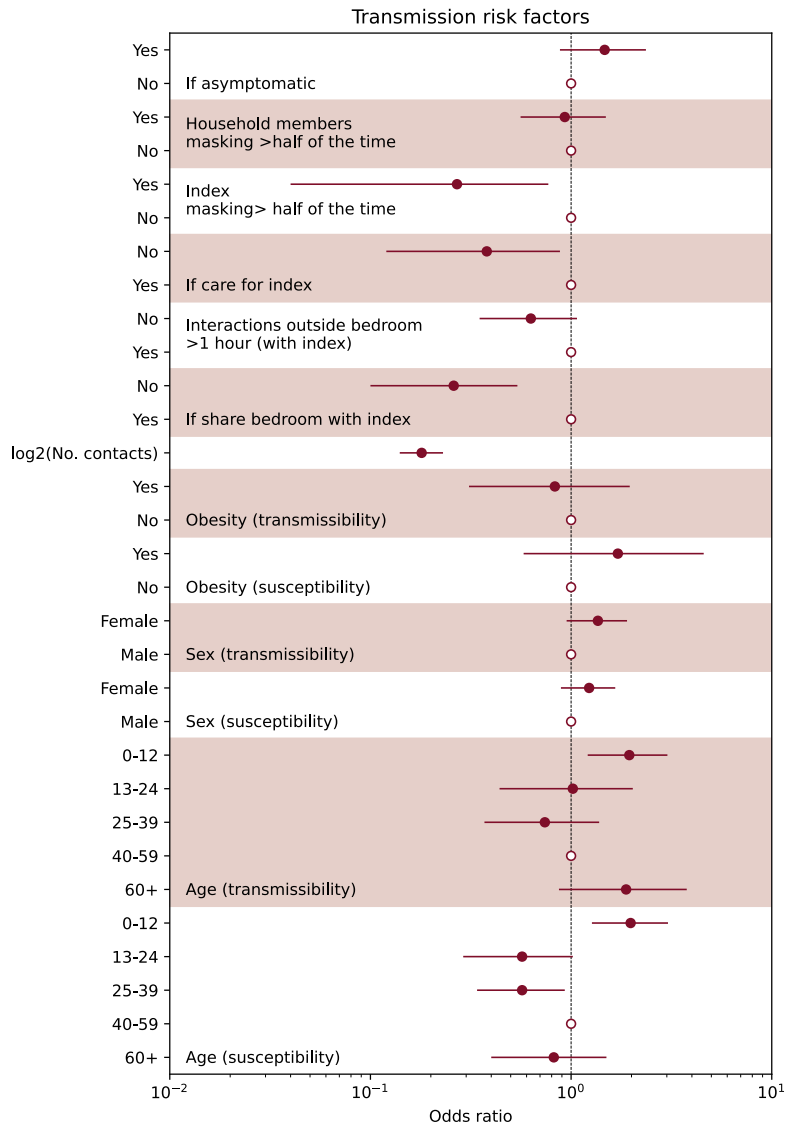

1  
2 **Figure S5:** Estimates from the chain-binomial household transmission model excluding households with either index  
3 case or household members who had received\_vaccination prior or during the study period. Solid dots and horizontal  
4 lines represent point estimates and 95% confidence intervals of the adjusted odds ratios of transmission risk factors.  
5 Circles represent the reference class.

6
